# Supplementary material for: Au@Ag core–shell nanoparticles with a hidden internal reference promoted quantitative solid phase microextraction-surface enhanced Raman spectroscopy detection
Source: Royal Society of Chemistry journal article supplement (doi:10.1039/c7ra03164e), 2017-01-01
Supplement: c7ra03164e1.pdf [file c7ra03164e1.pdf]

## Supporting information

### **Au@Ag core-shell nanoparticles with hidden internal reference promoted quantitative solid phase microextraction-surface enhanced Raman spectroscopy detection**

Lei Sun, Min Zhang, Vinothkumar Natarajan, Xiaofei Yu, Xiaoli Zhang\*, and Jinhua  
Zhan\*

*Key Laboratory for Colloid & Interface Chemistry of Education Ministry, Department  
of Chemistry, Shandong University, Jinan, Shandong, 250100, P. R. China*

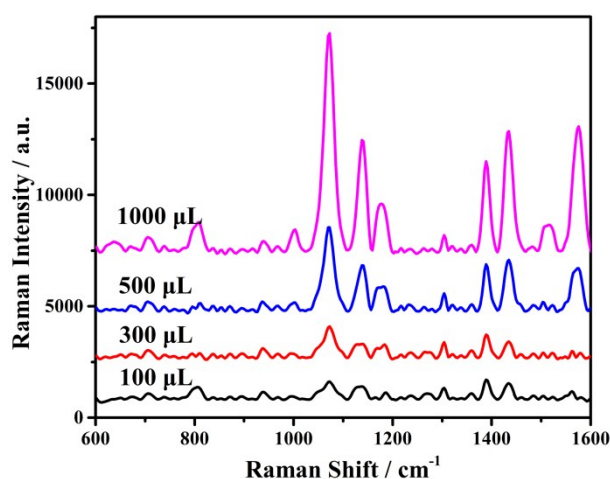

**Fig. S1** Raman spectra of Au@4-ATP@Ag NPs with different volume of 4-ATP embedded. The concentration of 4-ATP is 0.01 mM.

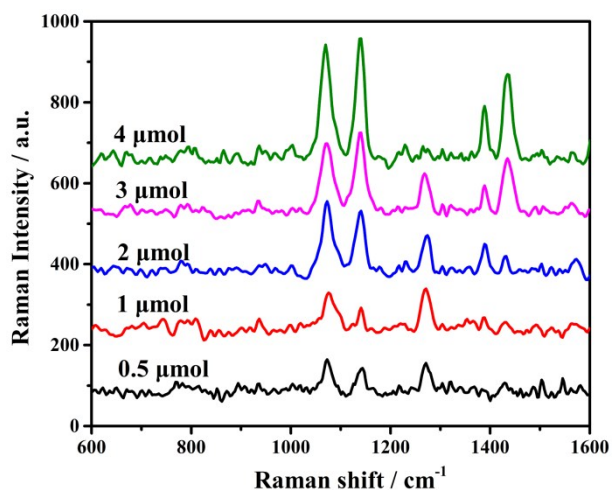

**Fig. S2** Raman spectra of Au@4-ATP@Ag NPs prepared by adding different amount of  $\text{AgNO}_3$  to form the shell.

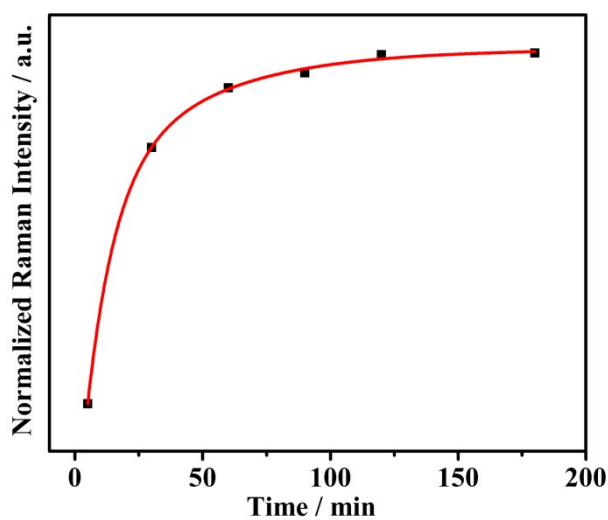

**Fig. S3** The kinetic curve of MG adsorption.

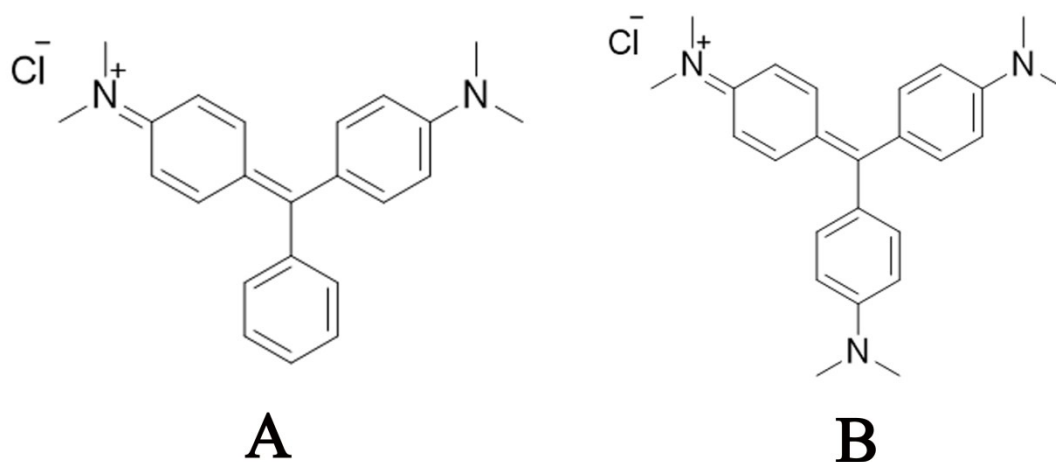

**Fig. S4** Chemical structure of MG (A) and CV (B).

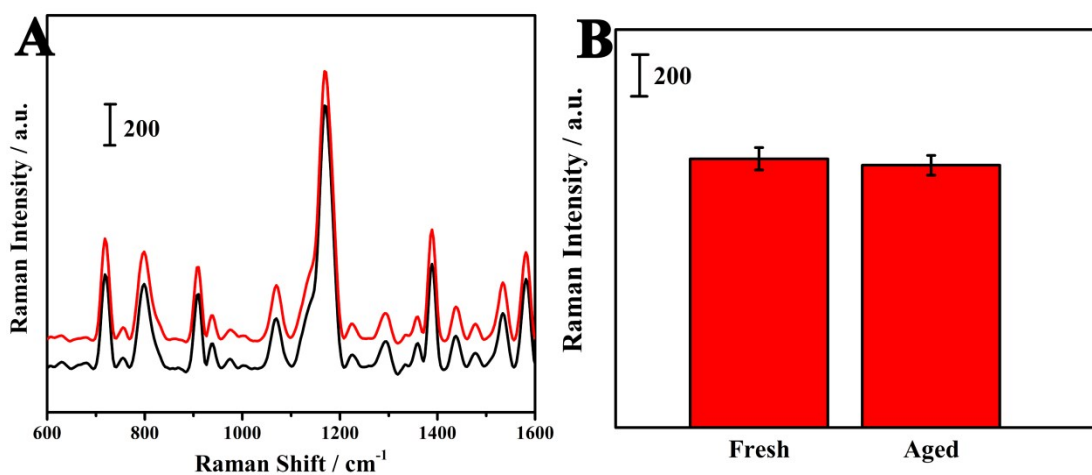

**Fig. S5** (A) The SERS spectra of MG on the fresh prepared and aged fibers. (B) The SERS intensity of MG at  $1174\text{ cm}^{-1}$  on fresh prepared SPME fibers and on SPME fibers aged for 2 months. The error bars were obtained from five parallel experiments.

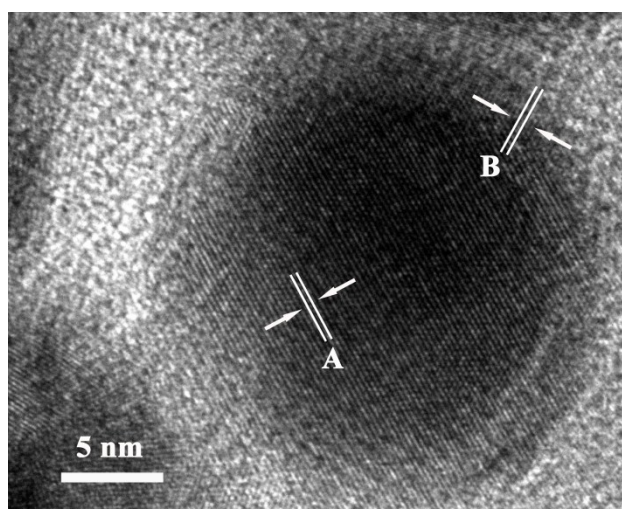

**Fig. S6** HRTEM image of the Au@4-ATP@Ag NPs. (A) interplanar distance of gold; (B) interplanar distance of silver.

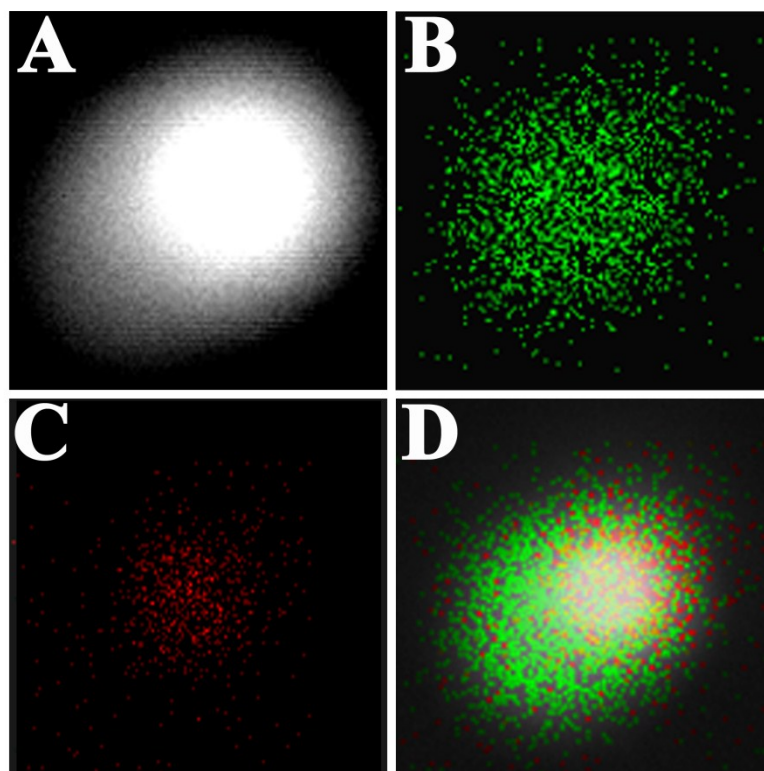

**Fig. S7** STEM-HAADF image (A) and EDS elemental mapping images of the Au@4-ATP@Ag NP for Ag map (B), Au map (C) and an overlay of the Au and Ag maps (D).

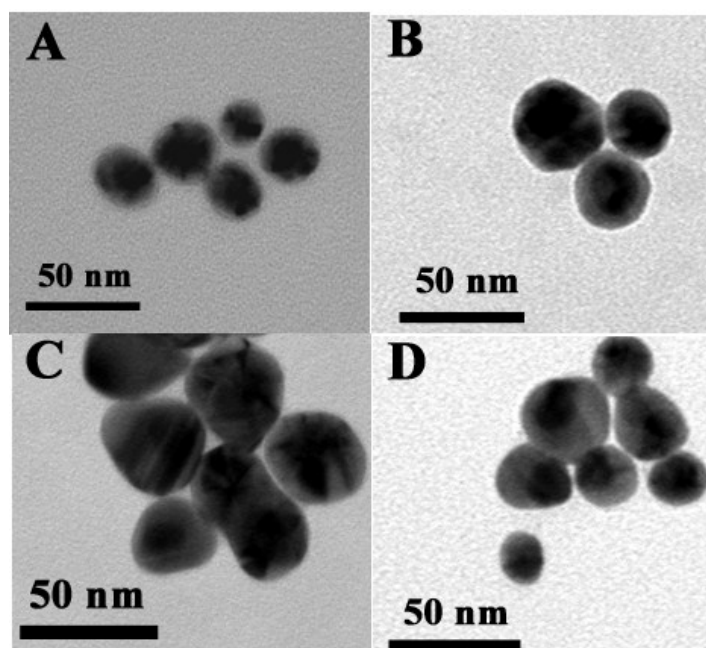

**Fig. S8** TEM images of Au@4-ATP@Ag nanoparticles.

**Table. S1** The detection of CV compared with other SERS sensor

| SERS Substrates  | Au sol <sup>1</sup> | Au-Ag core-shell sol <sup>2</sup> | Au/ZnO nanostructure <sup>3</sup>  | Our fiber In this work                       |
|------------------|---------------------|-----------------------------------|------------------------------------|----------------------------------------------|
| Linear range (M) | Not Mentioned       | Not Mentioned                     | 10 <sup>-6</sup> -10 <sup>-9</sup> | 5 × 10 <sup>-8</sup> to 5 × 10 <sup>-6</sup> |
| R <sup>2</sup>   | Not Mentioned       | Not Mentioned                     | 0.978                              | 0.990                                        |
| LOD (nM)         | 1000                | 100                               | 0.103                              | 1.9                                          |

**Table. S2** The detection of CV compared with other methods

| Methods     | LC-MS <sup>4</sup> | HPLC <sup>5</sup> | LC-MS-MS <sup>6</sup> | Our fiber In this work |
|-------------|--------------------|-------------------|-----------------------|------------------------|
| LOD (μg/kg) | 0.18               | 0.20              | 0.35                  | 0.78                   |

1. K. Zhang, T. Zeng, X. Tan, W. Wu, Y. Tang, H. Zhang, *Appl. Surf. Sci.*, 2015, **347**, 569-573.
2. L. Pei, Y. Huang, C. Li, Y. Zhang, B.A. Rasco, K. Lai, *J. Nanomat.* 2014, **2014**, 3.
3. B. Li, Y. E. Shi, J. Cui, Z. Liu, X. Zhang and J. Zhan, *Anal Chim Acta*, 2016, **923**, 66-73.
4. W. C. Andersen, S. B. Turnipseed, C. M. Karbiwnyk, R. H. Lee, S. B. Clark, W. D. Rowe, M. R. Madson and K. E. Miller, *Anal Chim Acta*, 2009, **637**, 279-289.
5. H. C. Thompson, L. G. Rushing, T. Gehring and R. Lochmann, *J Chromatogr B*, 1999, **723**, 287-291.
6. G. Dowling, P. P. Mulder, C. Duffy, L. Regan and M. R. Smyth, *Anal Chim Acta*, 2007, **586**, 411-419.
